# Supplementary material
Source: MDPI journal article supplement (https://www.mdpi.com/2077-0472/12/2/231)
Supplement: s1 [file s1]

## Supplementary Materials

**Table S1.** Weather conditions during the seven crop growing seasons

| Crop and year | Growth periods | Time (days) | P (+ irr.) (mm) | ETc (mm) | P-ETc (mm) | Moisture conditions |
|---------------|----------------|-------------|-----------------|----------|------------|---------------------|
| BW 2005       | Ini            | 31          | 149             | 14       | 135        | Wet                 |
|               | Dev            | 145         | 289             | 160      | 129        | Wet                 |
|               | Mid            | 41          | 65              | 196      | -131       | Dry                 |
|               | Late           | 31          | 17              | 123      | -106       | Dry                 |
| SU 2006       | Ini            | 30          | 63              | 24       | 39         | Wet                 |
|               | Dev            | 42          | 81              | 90       | -9         | Dry                 |
|               | Mid            | 53          | 23              | 161      | -137       | Dry                 |
|               | Late           | 30          | 11              | 48       | -37        | Dry                 |
| BW 2007       | Ini            | 32          | 14              | 23       | -9         | Dry                 |
|               | Dev            | 147         | 246             | 159      | 86         | Wet                 |
|               | Mid            | 42          | 15              | 221      | -206       | Dry                 |
|               | Late           | 31          | 12              | 116      | -104       | Dry                 |
| BW 2009       | Ini            | 32          | 145             | 16       | 129        | Wet                 |
|               | Dev            | 147         | 320             | 182      | 138        | Wet                 |
|               | Mid            | 42          | 106             | 225      | -120       | Dry                 |
|               | Late           | 31          | 30              | 117      | -87        | Dry                 |
| SO 2010       | Ini            | 19          | 51              | 22       | 29         | Wet                 |
|               | Dev            | 35          | 99              | 129      | -30        | Dry                 |
|               | Mid            | 45          | 117             | 289      | -173       | Dry                 |
|               | Late           | 30          | 75              | 117      | -42        | Dry                 |
| MA 2018       | Ini            | 20          | 9 (+60)         | 48       | 21         | Wet                 |
|               | Dev            | 35          | 85 (+30)        | 166      | -51        | Dry                 |
|               | Mid            | 40          | 135             | 214      | -79        | Dry                 |
|               | Late           | 4           | 0               | 11       | -11        | Dry                 |
| MA 2020       | Ini            | 30          | 23              | 34       | -11        | Dry                 |
|               | Dev            | 40          | 55              | 152      | -97        | Dry                 |
|               | Mid            | 50          | 101             | 359      | -258       | Dry                 |
|               | Late           | 13          | 37              | 66       | -29        | Dry                 |

BW, bread wheat; SU, sunflower; SO, sorghum; MA, maize; P, total precipitation; irr., irrigation; ETc, crop evapotranspiration; Ini, initial; Dev, crop development; Mid, mid-season; Late, late-season.

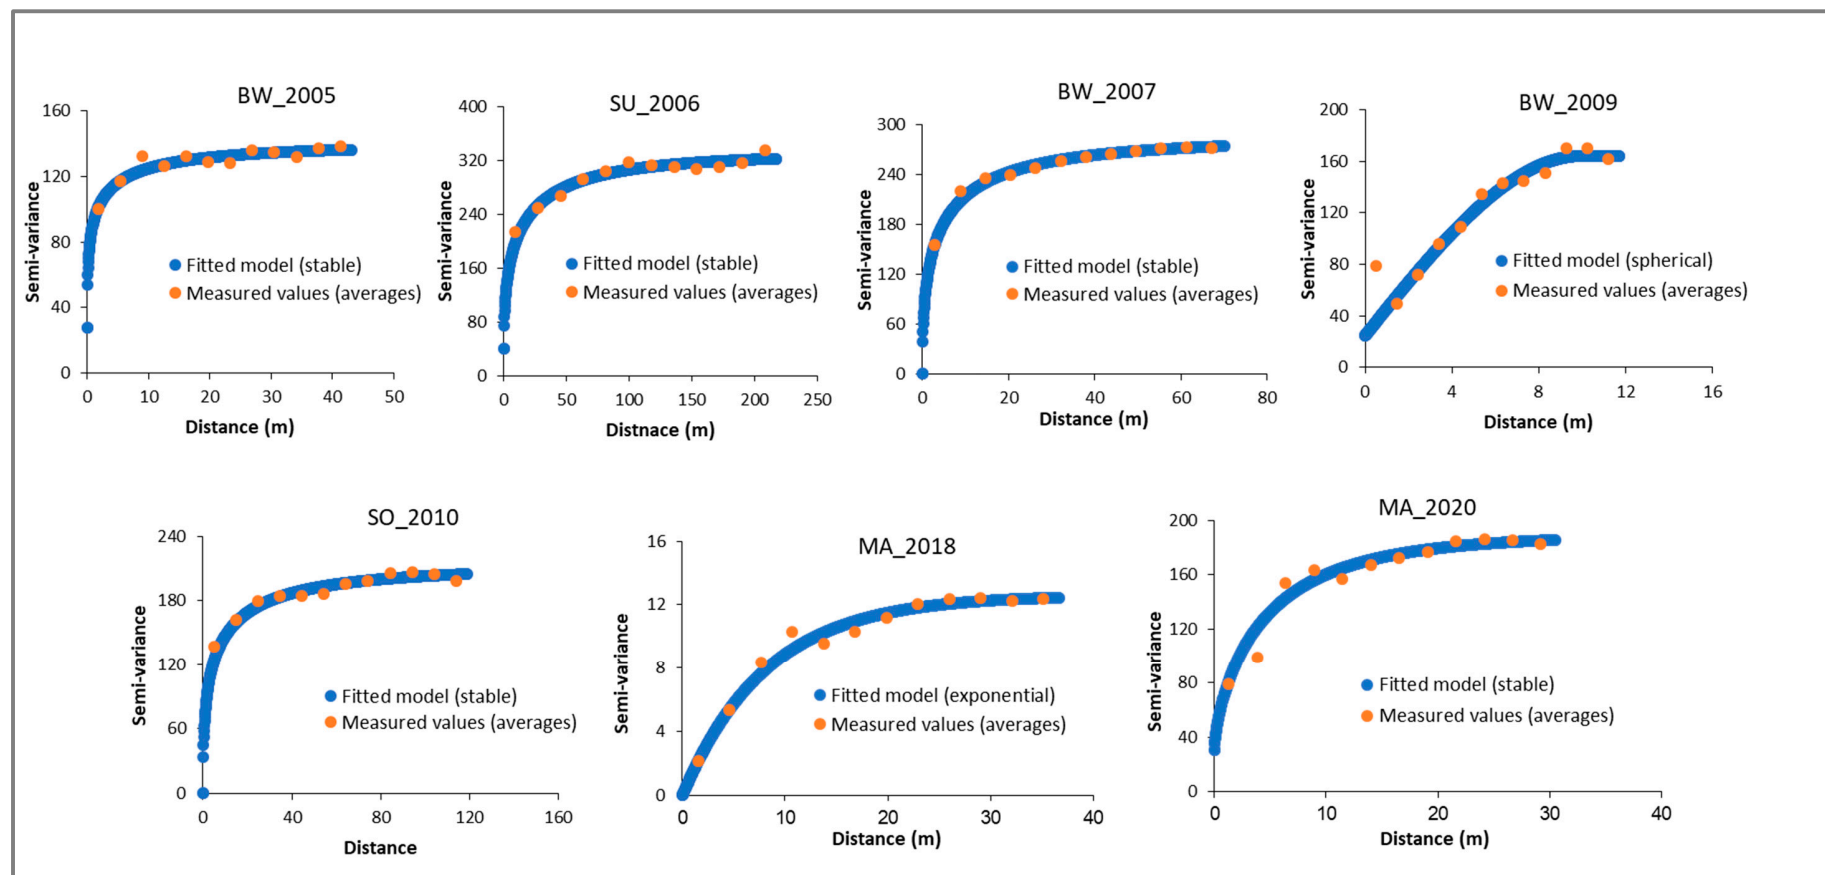

Figure S1. Semi-variogram model of standardized crop yields

**Table S2.** Descriptive statistics of soil traits

| Soil variables           | Mean | Median | Min  | Max  | SD   | Skewness | Kurtosis |
|--------------------------|------|--------|------|------|------|----------|----------|
| <b>Depth 0-30 cm</b>     |      |        |      |      |      |          |          |
| Sand (g/kg)              | 558  | 523    | 338  | 824  | 152  | 0.14     | -1.35    |
| Silt (g/kg)              | 363  | 400    | 141  | 540  | 122  | -0.21    | -1.33    |
| Clay (g/kg)              | 79   | 84.5   | 31   | 135  | 33   | 0.09     | -1.31    |
| pH                       | 7.92 | 7.88   | 7.62 | 8.22 | 0.16 | 0.27     | -0.47    |
| CaCO <sub>3</sub> (g/kg) | 145  | 147    | 125  | 166  | 10   | -0.08    | -0.4     |
| C (g/kg)                 | 15   | 15.5   | 9.44 | 19.7 | 2.79 | -0.25    | -0.61    |
| N (g/kg)                 | 1.8  | 1.87   | 1.22 | 2.37 | 0.35 | -0.15    | -0.9     |
| C:N                      | 8.39 | 8.33   | 7.65 | 9.15 | 0.42 | 0.09     | -0.9     |
| EC <sub>e</sub> (dS/m)   | 0.38 | 0.39   | 0.26 | 0.52 | 0.08 | 0.17     | -0.91    |
| <b>Depth 30-60 cm</b>    |      |        |      |      |      |          |          |
| Sand (g/kg)              | 540  | 492    | 331  | 789  | 148  | 0.33     | -1.33    |
| Silt (g/kg)              | 345  | 373    | 165  | 518  | 112  | -0.1     | -1.26    |
| Clay (g/kg)              | 115  | 125    | 32   | 221  | 48   | 0.08     | -0.42    |
| pH                       | 7.94 | 7.90   | 7.6  | 8.29 | 0.17 | 0.27     | -0.35    |
| CaCO <sub>3</sub> (g/kg) | 143  | 146    | 84   | 165  | 18.4 | -1.84    | 4.41     |
| C (g/kg)                 | 12   | 11.8   | 7.98 | 16   | 2.15 | 0        | -0.6     |
| N (g/kg)                 | 1.44 | 1.46   | 0.94 | 1.75 | 0.24 | -0.33    | -0.68    |
| C:N                      | 8.29 | 8.33   | 7.74 | 9.21 | 0.37 | 0.64     | 0.48     |
| EC <sub>e</sub> (dS/m)   | 0.46 | 0.41   | 0.26 | 0.76 | 0.14 | 0.88     | 0.08     |

Min, minimum; Max, maximum; SD, standard deviation.

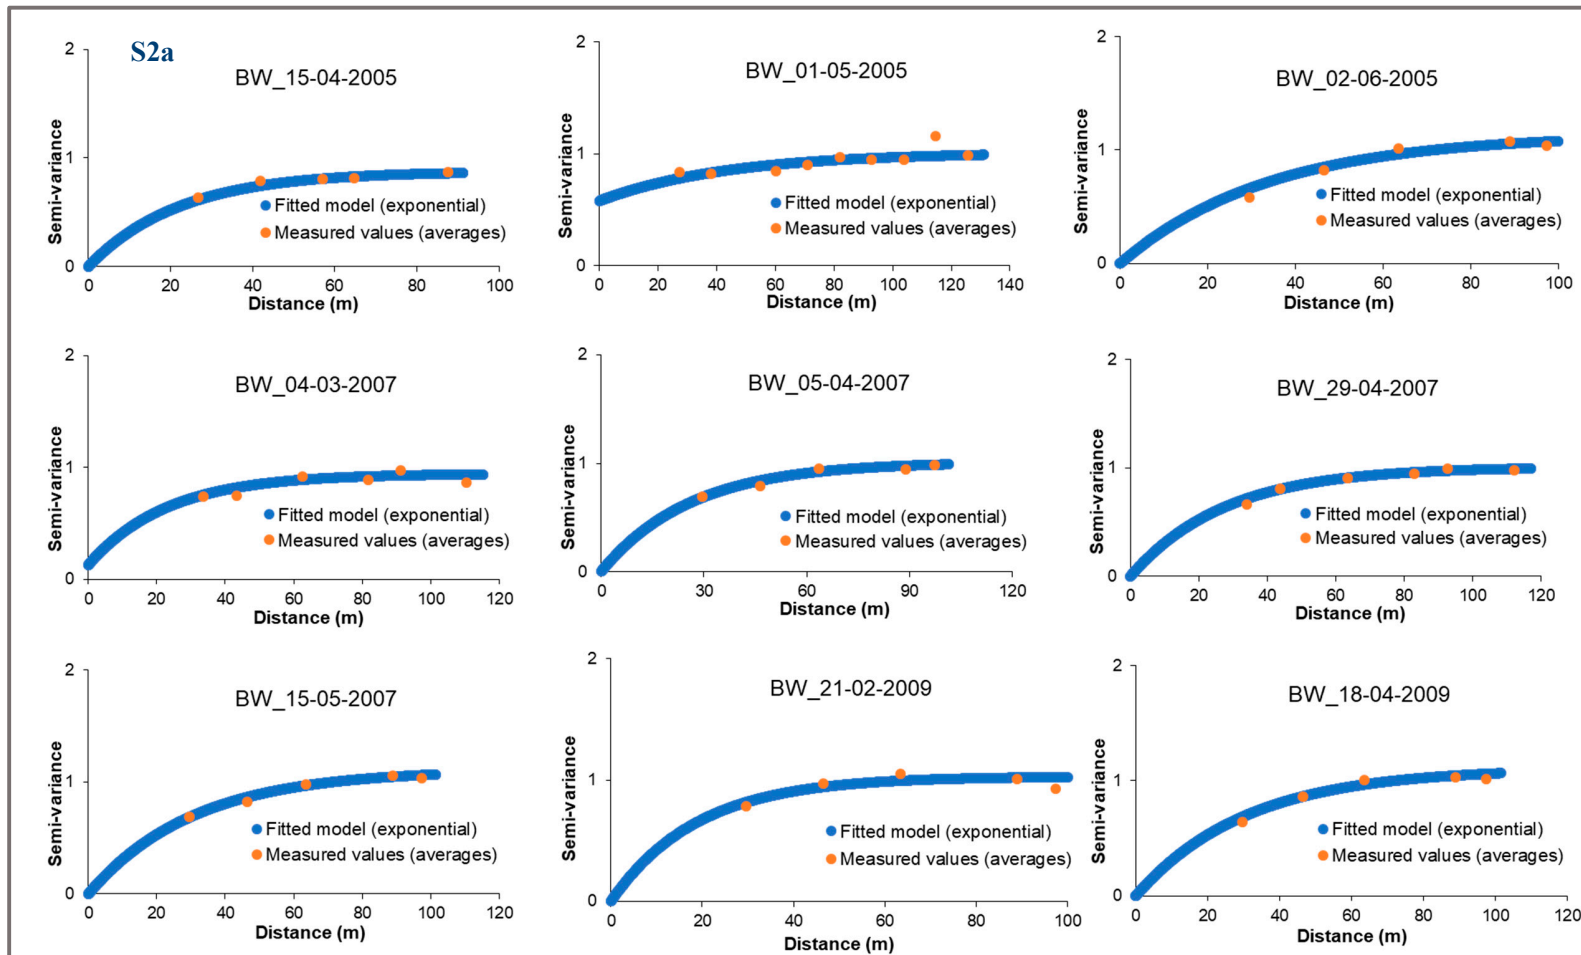

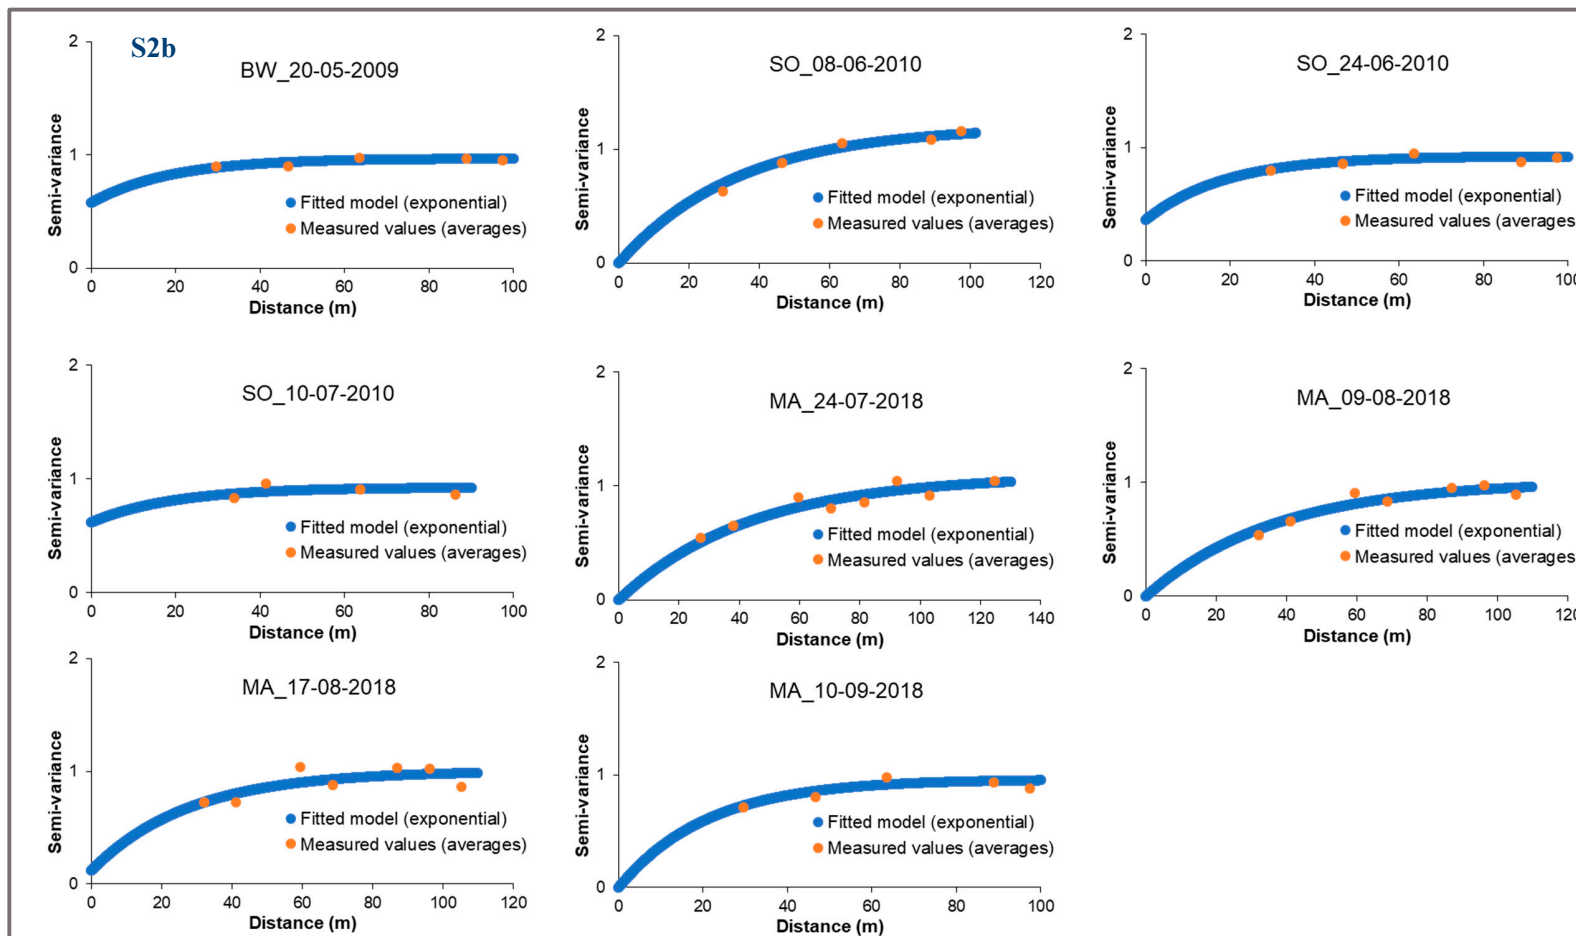

Figure S2. Semi-variogram models of NDVI data

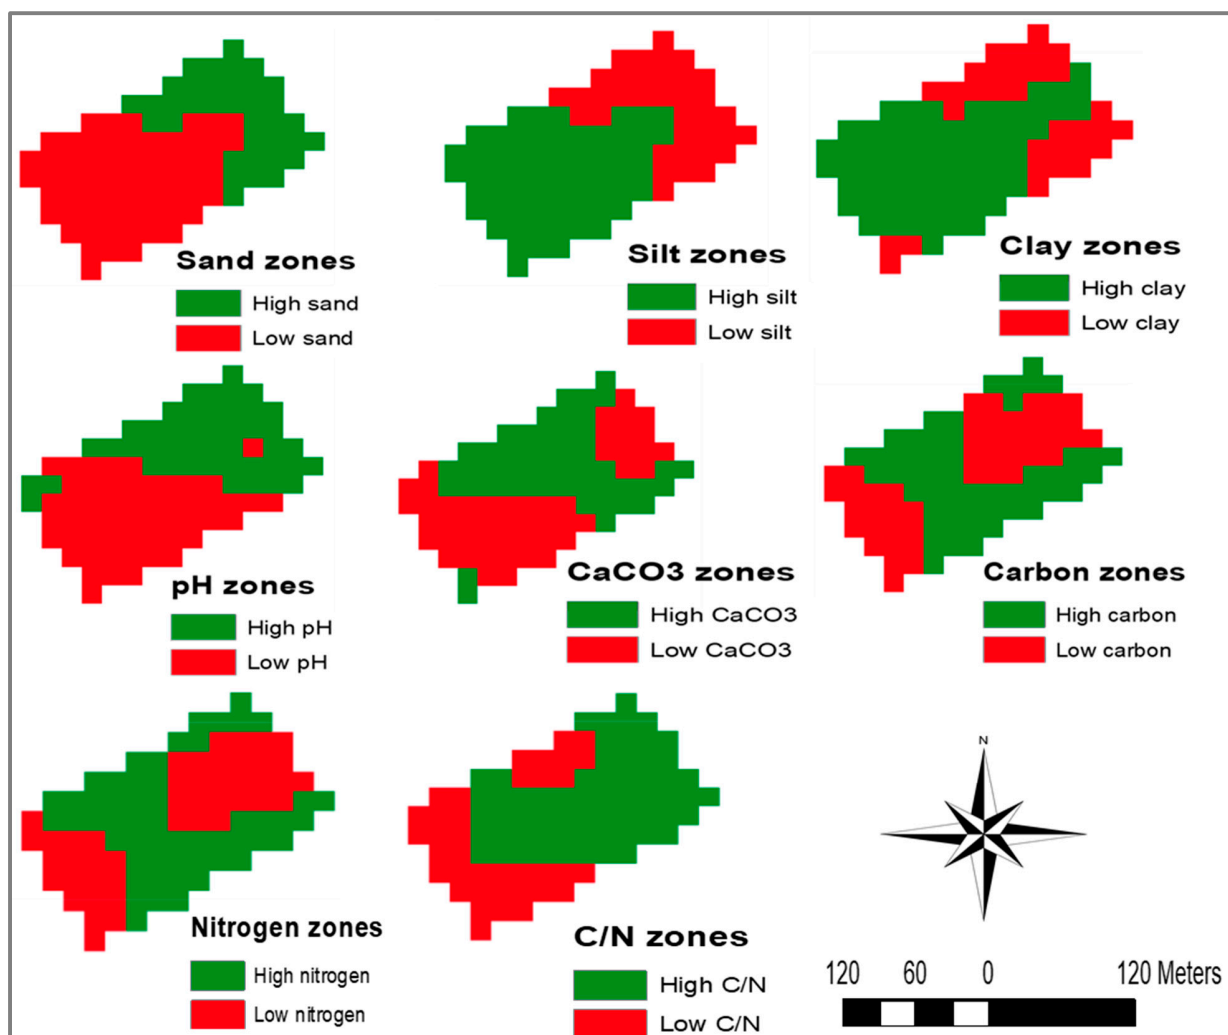

Figure S3. Single soil property zones

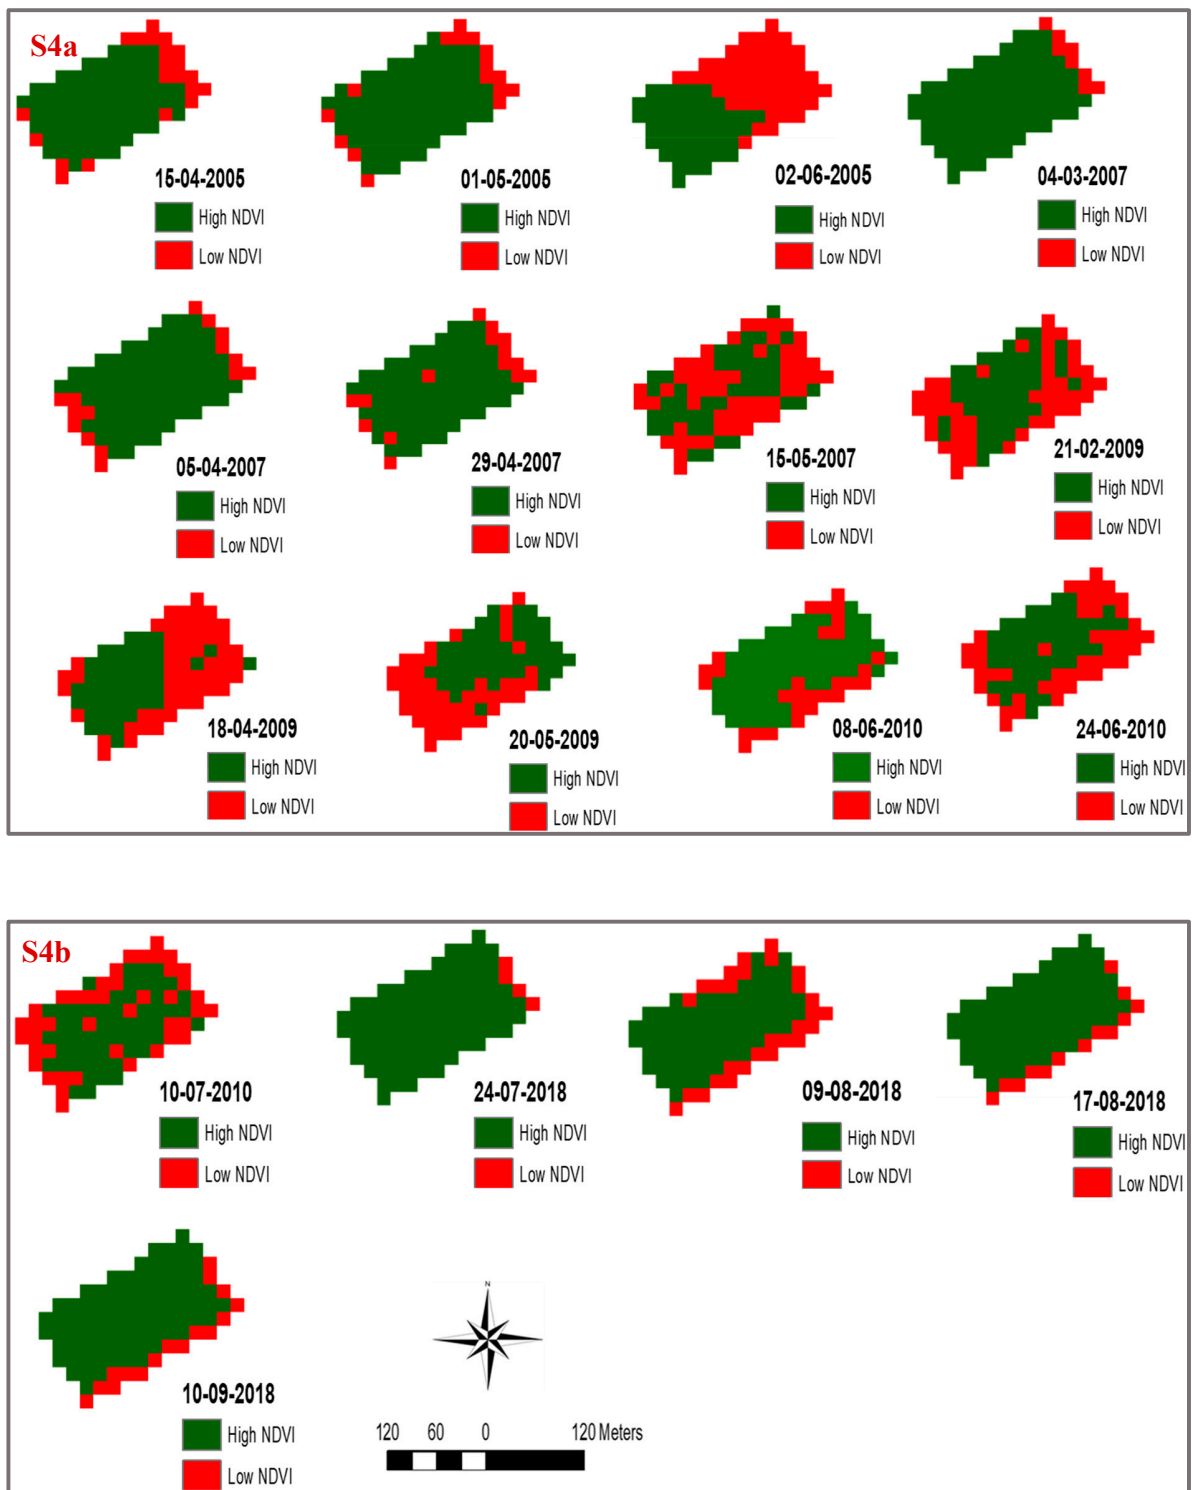

**Figure S4.** Single NDVI zones

**Table S3.** Statistical differences between 2-zone single soil property maps and their pixel agreements with yield

| zones                    |                        |             |                    |               |
|--------------------------|------------------------|-------------|--------------------|---------------|
| Soil traits              | Zones                  | Data points | Mean $\pm$ LSD     | Agreement (%) |
| Sand (g/kg)              | High sand              | 36          | 626 $\pm$ 43.2 a   | 63            |
|                          | Low sand               | 63          | 483 $\pm$ 34.3 b   |               |
| Silt (g/kg)              | High silt              | 63          | 404 $\pm$ 27.8 a   | 90            |
|                          | Low silt               | 36          | 292 $\pm$ 32.1 b   |               |
| Clay (g/kg)              | High clay              | 67          | 112 $\pm$ 7.39 a   | 94            |
|                          | Low clay               | 32          | 79.3 $\pm$ 10.42 b |               |
| pH                       | High pH                | 45          | 7.95 $\pm$ 0.01 a  | 72            |
|                          | Low pH                 | 54          | 7.92 $\pm$ 0.01 b  |               |
| CaCO <sub>3</sub> (g/kg) | High CaCO <sub>3</sub> | 49          | 146 $\pm$ 1.31 a   | 76            |
|                          | Low CaCO <sub>3</sub>  | 50          | 142 $\pm$ 1.05 b   |               |
| Carbon (g/kg)            | High Carbon            | 53          | 14.1 $\pm$ 0.62 a  | 80            |
|                          | Low Carbon             | 46          | 12.4 $\pm$ 0.63 b  |               |
| Nitrogen (g/kg)          | High Nitrogen          | 54          | 1.69 $\pm$ 0.08 a  | 81            |
|                          | Low Nitrogen           | 45          | 1.48 $\pm$ 0.07 b  |               |
| C/N                      | High C/N               | 62          | 8.42 $\pm$ 0.06 a  | 89            |
|                          | Low C/N                | 37          | 8.23 $\pm$ 0.05 b  |               |

Statistical differences between 2-zones of single soil property and their pixel agreement (%) with crop yields. Means bearing different letters are significantly different within 2-zone classes at  $p = 0.05$  level according to the least-significant difference (LSD) test.

**Table S4.** Statistical differences between 2-zone single NDVI maps and their pixel agreements with yield zones

| Crop & year | Date   | Zones     | Data points | Mean $\pm$ LSD     | Agreement (%) |
|-------------|--------|-----------|-------------|--------------------|---------------|
| BW 2005     | 15-Apr | High NDVI | 78          | 0.70 $\pm$ 0.012 a | 95            |
|             |        | Low NDVI  | 21          | 0.65 $\pm$ 0.032 b |               |
|             | 1-May  | High NDVI | 83          | 0.77 $\pm$ 0.01 a  | 90            |
|             |        | Low NDVI  | 16          | 0.72 $\pm$ 0.014 b |               |
|             | 2-Jun  | High NDVI | 47          | 53 $\pm$ 0.01 a    | 74            |
|             |        | Low NDVI  | 52          | 48 $\pm$ 0.02 b    |               |
| BW 2007     | 4-Mar  | High NDVI | 91          | 0.72 $\pm$ 0.015 a | 83            |
|             |        | Low NDVI  | 9           | 0.63 $\pm$ 0.027 b |               |
|             | 5-Apr  | High NDVI | 84          | 0.84 $\pm$ 0.008 a | 89            |
|             |        | Low NDVI  | 15          | 0.80 $\pm$ 0.014 b |               |
|             | 29-Apr | High NDVI | 84          | 0.67 $\pm$ 0.006 a | 89            |
|             |        | Low NDVI  | 15          | 0.64 $\pm$ 0.013 b |               |
|             | 15-May | High NDVI | 44          | 0.62 $\pm$ 0.006 a | 71            |
|             |        | Low NDVI  | 55          | 0.60 $\pm$ 0.009 b |               |
| BW 2009     | 21-Feb | High NDVI | 50          | 0.57 $\pm$ 0.014 a | 77            |
|             |        | Low NDVI  | 49          | 0.52 $\pm$ 0.021 b |               |
|             | 18-Apr | High NDVI | 45          | 0.70 $\pm$ 0.013 a | 72            |
|             |        | Low NDVI  | 54          | 0.66 $\pm$ 0.021 b |               |
|             | 20-May | High NDVI | 51          | 0.62 $\pm$ 0.005 a | 78            |
|             |        | Low NDVI  | 48          | 0.60 $\pm$ 0.001 b |               |
| SO 2010     | 8-Jun  | High NDVI | 70          | 0.50 $\pm$ 0.02 a  | 97            |
|             |        | Low NDVI  | 29          | 0.43 $\pm$ 0.033 b |               |
|             | 24-Jun | High NDVI | 51          | 0.73 $\pm$ 0.004 a | 78            |
|             |        | Low NDVI  | 48          | 0.71 $\pm$ 0.013 b |               |
|             | 10-Jul | High NDVI | 56          | 0.73 $\pm$ 0.002 a | 83            |
|             |        | Low NDVI  | 43          | 0.72 $\pm$ 0.009 b |               |
| MA 2018     | 24-Jul | High NDVI | 95          | 0.60 $\pm$ 0.033 a | 78            |
|             |        | Low NDVI  | 4           | 0.38 $\pm$ 0.068 b |               |
|             | 9-Aug  | High NDVI | 71          | 0.66 $\pm$ 0.022 a | 98            |
|             |        | Low NDVI  | 28          | 0.56 $\pm$ 0.042 b |               |
|             | 17-Aug | High NDVI | 86          | 0.81 $\pm$ 0.023 a | 87            |
|             |        | Low NDVI  | 13          | 0.62 $\pm$ 0.074 b |               |
|             | 10-Sep | High NDVI | 83          | 0.59 $\pm$ 0.028 a | 90            |
|             |        | Low NDVI  | 16          | 0.42 $\pm$ 0.057 b |               |

Statistical differences between 2-zones of NDVI data and their pixel agreement (%) with crop yields. Means bearing different letters are significantly different within 2-zone classes at  $p = 0.05$  level according to the least-significant difference (LSD) test

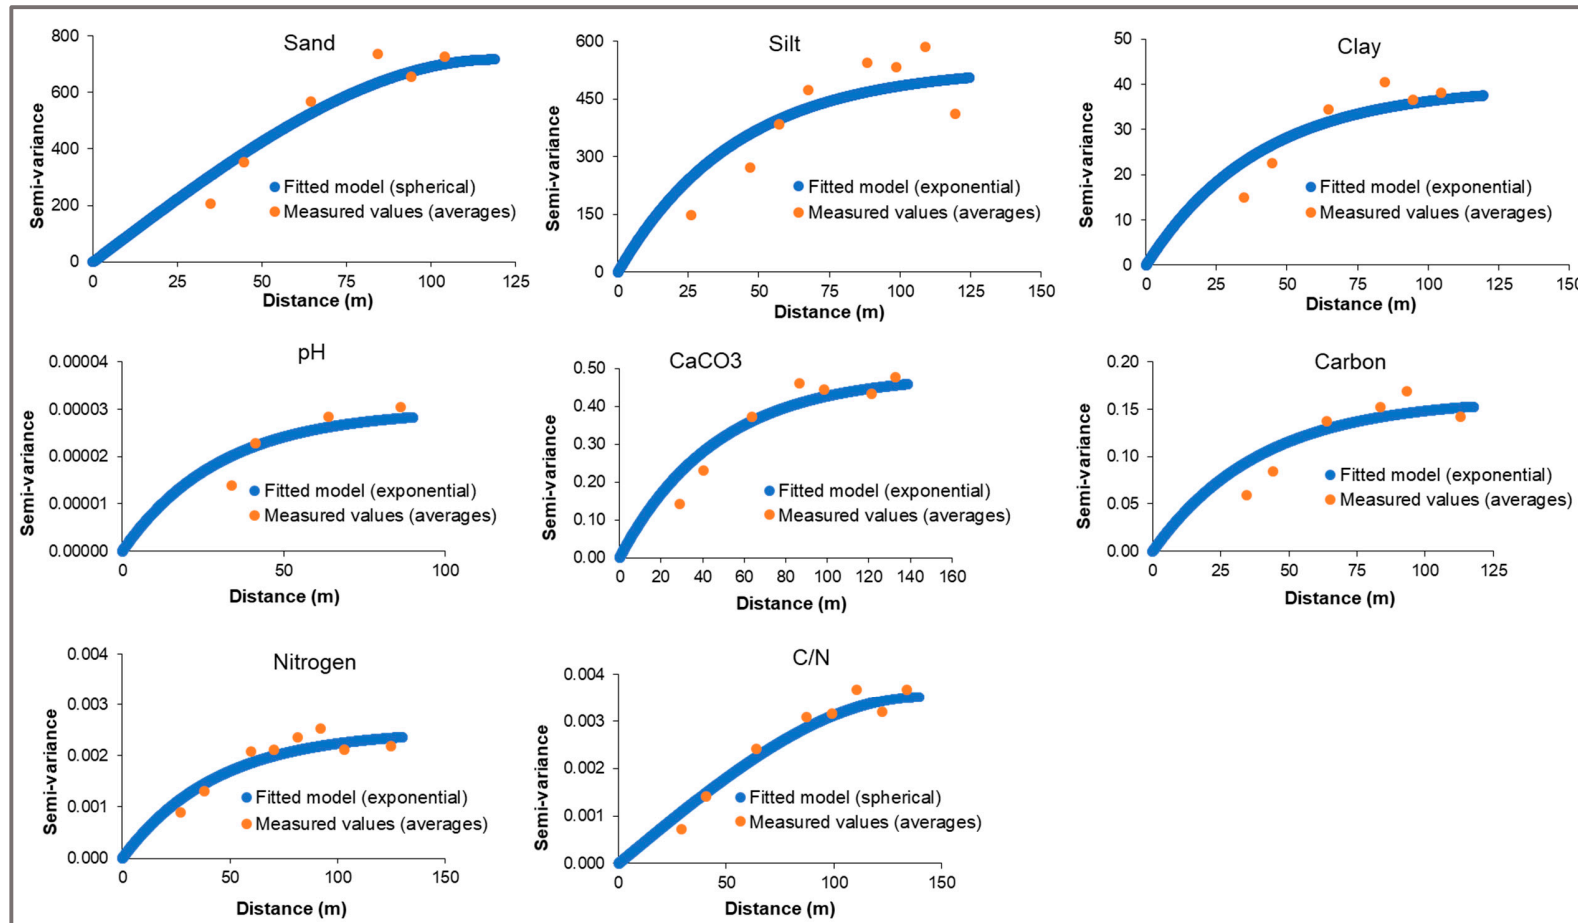

Figure S5. Semi-variogram graph of soil traits
